# Supplementary material for: Phylogenetic and Expression Analysis of the Sucrose Synthase and Sucrose Phosphate Synthase Gene Family in Potatoes
Source: MDPI journal article supplement (doi:10.3390/metabo14010070), 2024-01-20
Supplement: s1 [file s1]

**Table S1. The primers used in this study.**

| Genes             | Forward                  | Reverse                   | Melting Temperature |
|-------------------|--------------------------|---------------------------|---------------------|
| <i>StSPS I</i>    | GTTTATTGTCAAAATGGGAG     | ATTCCTCGTCCGCTTGGATG      | 84°C                |
| <i>StSPS II</i>   | GCAATATATTGCCAAAGCGG     | CTCAAGAGGGTAGTTCCTGT      | 83°C                |
| <i>StSPS III</i>  | ATGTATTGCAGGAATTCAAC     | TTCTCTTAGGTAGCTCCCT       | 84°C                |
| <i>StSPS IV</i>   | TGTCTACACACATGCTGCA      | GTTGAAGCTGTCTTCATTG       | 84°C                |
| <i>StSUS I a</i>  | TCCAAAGAAGATCCAAGTT      | AACTTTCTCAGCAGATTTTC      | 82°C                |
| <i>StSUS I b</i>  | TTGAGAAATGTAAGGTAGA      | CAAGTTGAGCCAGCTTGC        | 84°C                |
| <i>StSUS I c</i>  | AAATGCAAGAAAGATCCTTC     | ACAGCTTCAGCCATCTTAC       | 84°C                |
| <i>StSUS II</i>   | CCAACGATGCGAACAAAAT      | GAACAGATTTTACCAACTC       | 83°C                |
| <i>StSUS IIIa</i> | ATGGAAGATCTATGCAAC       | <b>ATGACTGGCTGTTGATGA</b> | 84°C                |
| <i>StSUS IIIb</i> | ATGAAGAGCCCTTGCCAGCT     | TCATTCAACTATACGGTACA      | 84°C                |
| <i>Elf3e</i>      | GGAGCACAGGAGAAGATGAAGGAG | CGTTGGTGAATGCGGCAGTAGG    | 83°C                |

**Table S2. Variance analysis of the relative expression level of the *StSUSs* and *StSPSs* genes under 1%, 3%, and 5% sucrose, glucose and fructose treatments.**

|                | Source of variation | SS       | df | MS      | F      | P-value |
|----------------|---------------------|----------|----|---------|--------|---------|
| <i>SUS Ia</i>  | Treatment           | 8.02     | 8  | 1.00    | 105.79 | 0.00    |
|                | Error               | 0.17     | 18 | 0.01    |        |         |
| <i>SUS Ib</i>  | Treatment           | 132.73   | 8  | 16.59   | 7.48   | 0.00    |
|                | Error               | 39.92    | 18 | 2.22    |        |         |
| <i>SUS Ic</i>  | Treatment           | 54781.52 | 8  | 6847.69 | 379.42 | 0.00    |
|                | Error               | 324.86   | 18 | 18.05   |        |         |
| <i>SUS II</i>  | Treatment           | 42.16    | 8  | 5.27    | 9.41   | 0.00    |
|                | Error               | 10.08    | 18 | 0.56    |        |         |
| <i>SUSIIIa</i> | Treatment           | 0.76     | 8  | 0.09    | 5.48   | 0.00    |
|                | Error               | 0.31     | 18 | 0.02    |        |         |
| <i>SUSIIIb</i> | Treatment           | 1.06     | 8  | 0.13    | 3.75   | 0.01    |
|                | Error               | 0.63     | 18 | 0.04    |        |         |
| <i>SPS I</i>   | Treatment           | 1.99     | 8  | 0.25    | 3.89   | 0.01    |
|                | Error               | 1.15     | 18 | 0.06    |        |         |
| <i>SPS II</i>  | Treatment           | 5.87     | 8  | 0.73    | 4.50   | 0.00    |
|                | Error               | 2.93     | 18 | 0.16    |        |         |
| <i>SPSIII</i>  | Treatment           | 2.94     | 8  | 0.37    | 7.33   | 0.00    |
|                | Error               | 0.90     | 18 | 0.05    |        |         |
| <i>SPSIV</i>   | Treatment           | 1.48     | 8  | 0.18    | 1.77   | 0.15    |
|                | Error               | 1.88     | 18 | 0.10    |        |         |
